# Supplementary material
Source: Springer Nature journal article supplement (https://www.springermedizin.de/resource/supplementary/12891_2009_907_MOESM2_ESM.pdf/9506678)

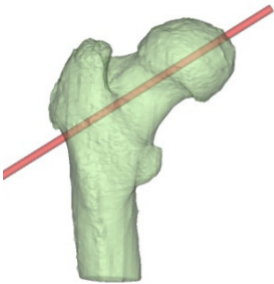

(a)

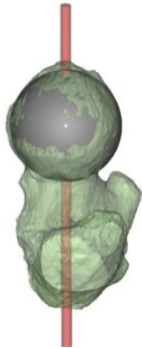

(b)

Supplement: MOESM2 [file 9506678]
